# Supplementary material
Source: PubMed Central journal article supplement (PMC4495357)
Supplement: cdd2014222x1.pdf [file cdd2014222x1.pdf]

## Supplemental Information

### Necroptosis Suppresses Inflammation Via Termination of TNF- or LPS-Induced Cytokine and Chemokine Production

Conor J. Kearney, Sean P. Cullen, Graham A. Tynan, Conor M. Henry, Danielle Clancy, Ed C. Lavelle, and Seamus J. Martin.

#### Supplemental Information Inventory

1. **Figure S1.** (related to figure 1). MEFs produce TNF-induced cytokines and undergo RIPK3-dependant necroptosis. Also shows that zVAD accelerates TNF-induced necroptosis in L929 cells, using PI staining as a marker of necrosis.
2. **Figure S2** (related to Figure 2). Shows that necroptosis suppresses TNF-induced cytokine production when cells are sensitized using an IAP antagonist. Furthermore, zVAD does not affect TNF-induced cytokines in the absence of necroptosis (HT-29 cells).
3. **Figure S3** (related to Figure 3). Shows that zVAD does not affect TNF-induced cytokines, in the absence of necroptosis.
4. **Figure S4** (related to Figure 4). Necrostatin-1 inhibits TNF-induced cytokines in MEFs, in the absence of cell death.
5. **Figure S5** (related to Figure 5). Contains the full cell death data set from figure 5. Also shows that zVAD does not affect LPS-induced cytokines, in the absence of necroptosis (THP-1 cells).

## Supplemental Data

**Figure S1 (Related to Figure 1)**

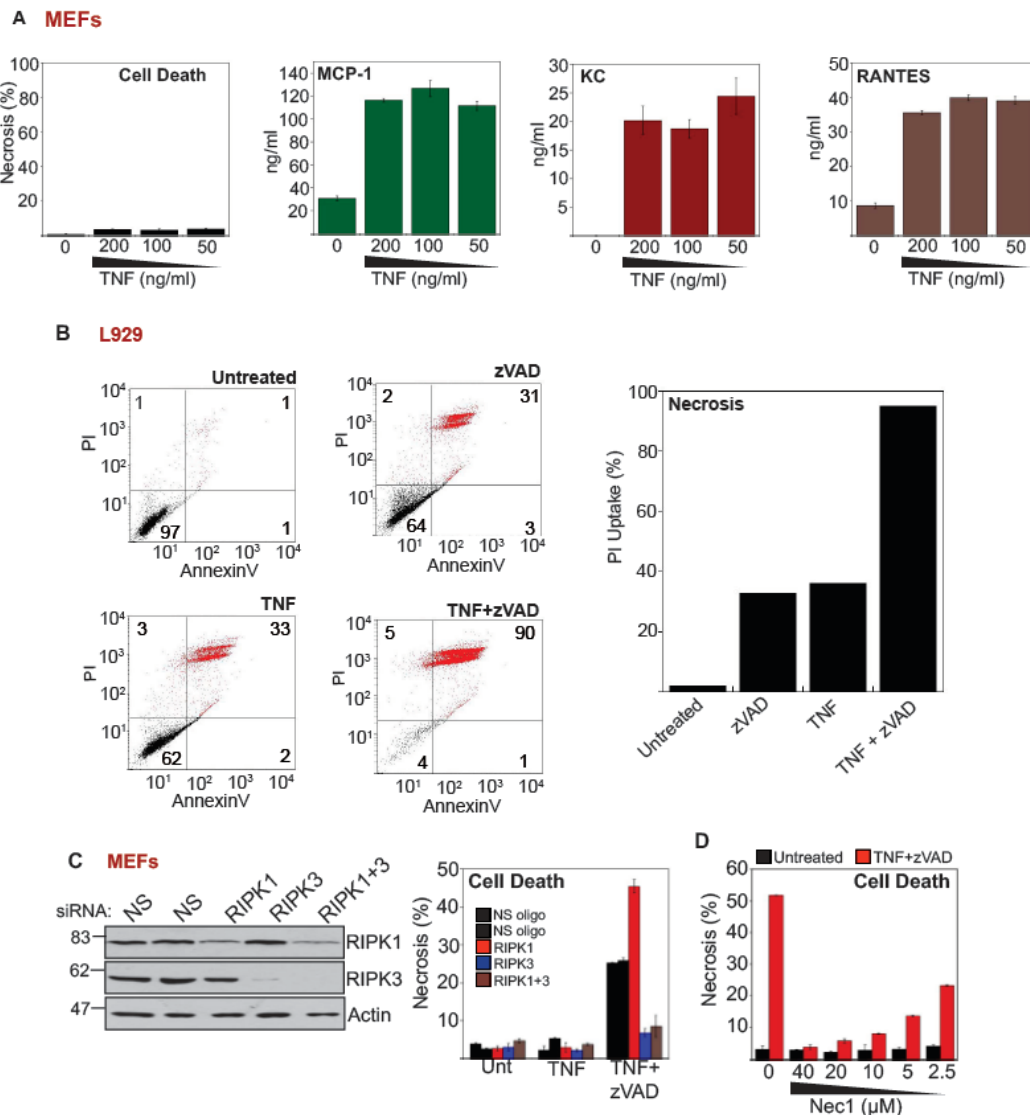

**Figure S1. TNF induces cytokine production and necroptosis.**

(A) MEFs were treated with the indicated concentrations of TNF. After 24 h, cell death was scored by morphology and cytokine/chemokine concentrations in the culture supernatants were determined by ELISA.

(B) L929 cells were pretreated with zVAD (10  $\mu$ M) for 1 h, followed by addition of TNF (10 ng/ml). After 24 h, cell death was analysed by AnnexinV / Propidium Iodide staining.

(C) MEFs were electroporated with either non-silencing siRNA or siRNA directed against RIPK1, RIPK3 or RIPK1 and RIPK3, as indicated. Forty eight hours later, cells were pretreated in the presence or absence of zVAD (10  $\mu$ M) for 1 h, followed by addition of TNF (10 ng/ml). After 5 h, cell death was scored by morphological assessment and cell lysates were analysed by immunoblotting for levels of endogenous proteins.

(D) MEFs were pretreated for 1 h with the indicated concentrations of necrostatin-1 and zVAD (10  $\mu$ M), followed by addition of TNF (200 ng/ml). After 24 h, cell death was scored by morphology. Error bars represent the mean  $\pm$ SEM of triplicate determinations from a representative experiment.

Supplemental Data

Figure S2 (Related to Figure 2)

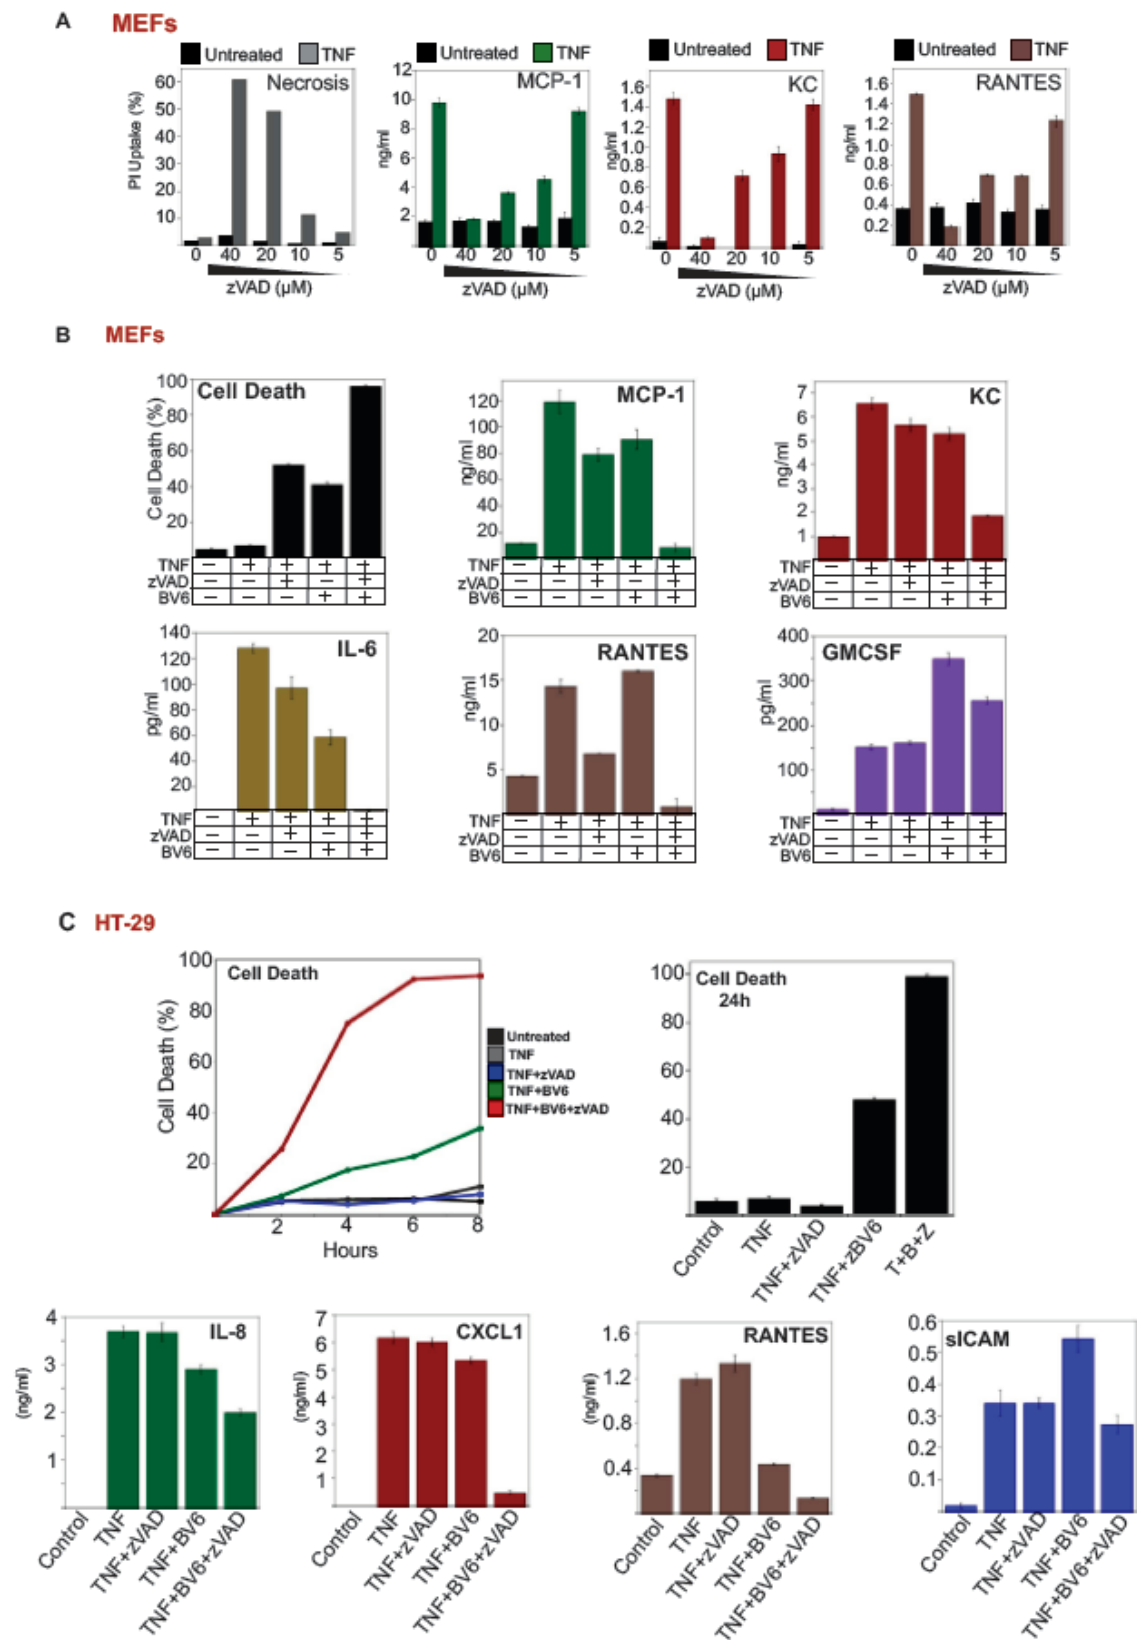

**Figure S2. Necroptosis suppresses cytokine production in cells requiring sensitization.**

(A) MEFs were pretreated with the indicated concentrations of zVAD for 1 h, followed by addition of TNF to 40 ng/ml. After 24 h, cell death was analysed by Propidium Iodide staining, and cytokine/chemokine concentrations in the culture supernatants were determined by ELISA.

(B) MEFs were pretreated with BV6 (2  $\mu$ M) and/or zVAD (10  $\mu$ M), for 1 h, followed by addition of TNF (10 ng/ml). After 24 h, cell death was scored by morphology and cytokine/chemokine concentrations in the culture supernatants were determined by ELISA.

(C) HT-29 cells were pretreated with BV6 (2  $\mu$ M) and/or zVAD (10  $\mu$ M), for 1 h, followed by addition of TNF (10 ng/ml). After 24 h (or the indicated timepoints), cell death was scored by morphology and cytokine/chemokine concentrations in the culture supernatants were determined by ELISA. Error bars represent the mean  $\pm$ SEM of triplicate determinations from a representative experiment.

## Supplemental Data

**Figure S3 (Related to Figure 3)**

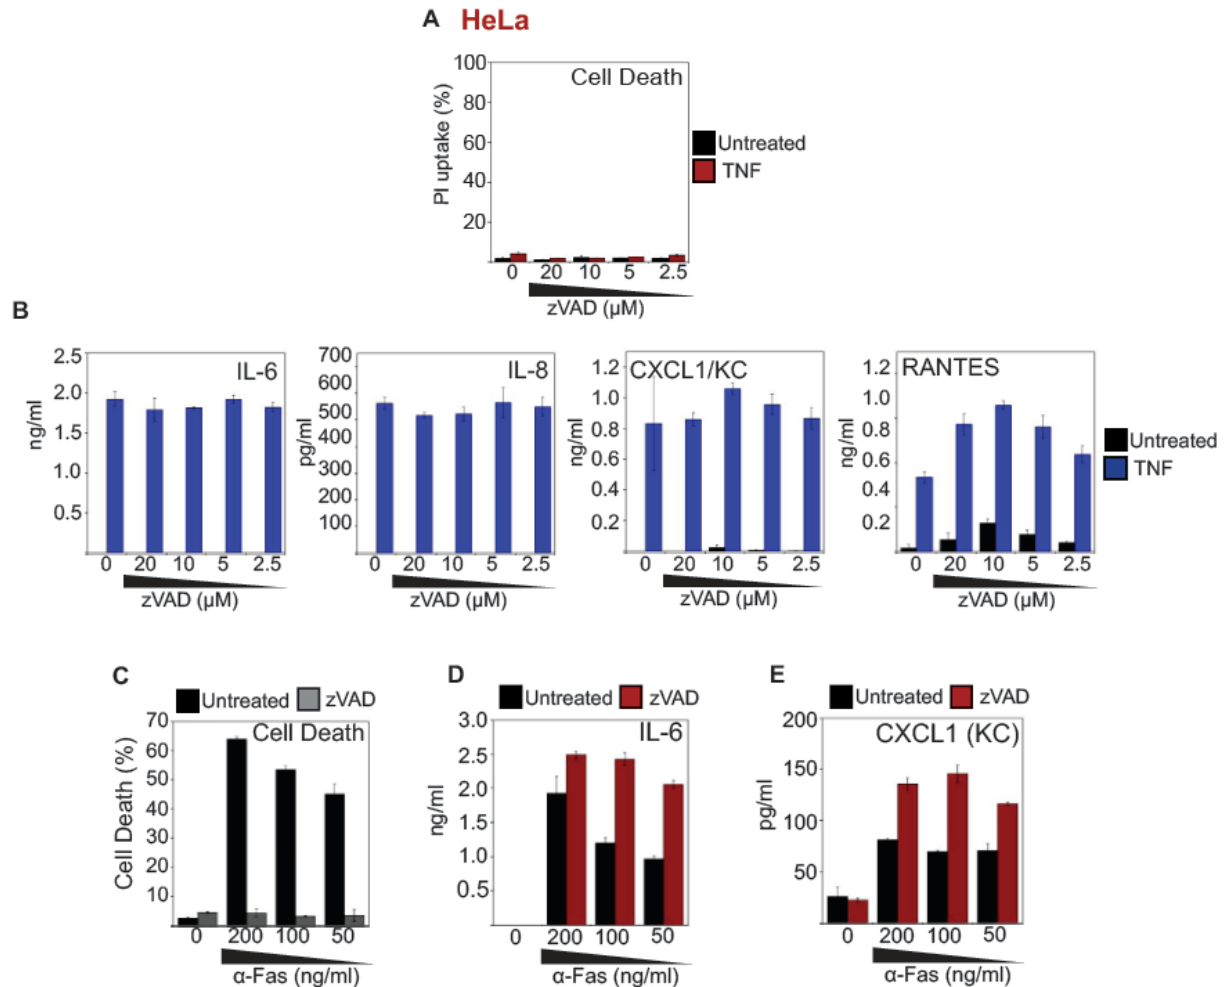

### **Figure S3. Caspase activity is not required for TNF-induced cytokine production.**

(A) HeLa cells were pretreated with the indicated concentrations of zVAD for 1 h, followed by addition of TNF to 5 ng/ml. After 24 h, cell death was analysed by Propidium Iodide staining.

(B) Cytokine/chemokine concentrations in the culture supernatants from A were determined by ELISA. Error bars represent the mean  $\pm$ SEM of triplicate cell cultures.

(C) HeLa cells were pretreated for 1 h in the presence or absence of zVAD (10  $\mu$ M), followed by addition of anti-Fas (CH11), (100 ng/ml). After 24 h, cell death was analysed by morphology. A minimum of 300 cells was counted per treatment.

(D-E) Cytokine/chemokine concentrations in the culture supernatants from C were determined by ELISA. Error bars represent the mean  $\pm$ SEM of triplicate cell cultures.

## Supplemental Data

Figure S4 (Related to Figure 4)

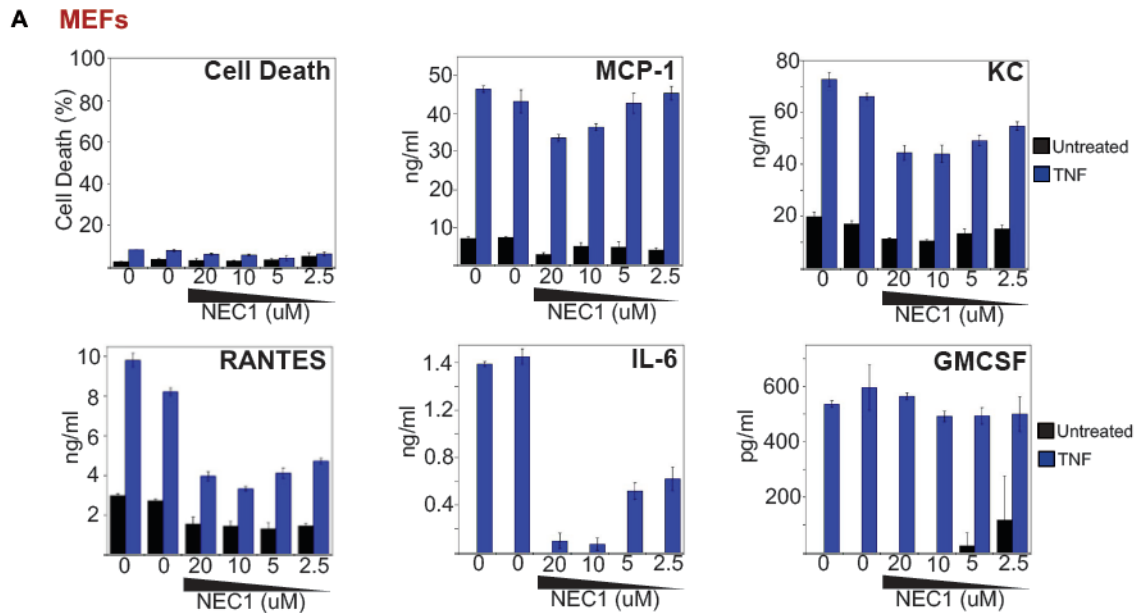

**Figure S4. Nec-1 inhibits TNF-induced cytokines in MEFs.**

(A) MEFs were pretreated with the indicated concentrations of Nec1 for 1 h, followed by addition of TNF (10 ng/ml). After 24 h, cell death was scored by morphology and cytokine/chemokine concentrations in the culture supernatants were determined by ELISA. Error bars represent the mean  $\pm$  SEM of triplicate determinations from a representative experiment.

Supplemental Data

Figure S5 (Related to Figure 5)

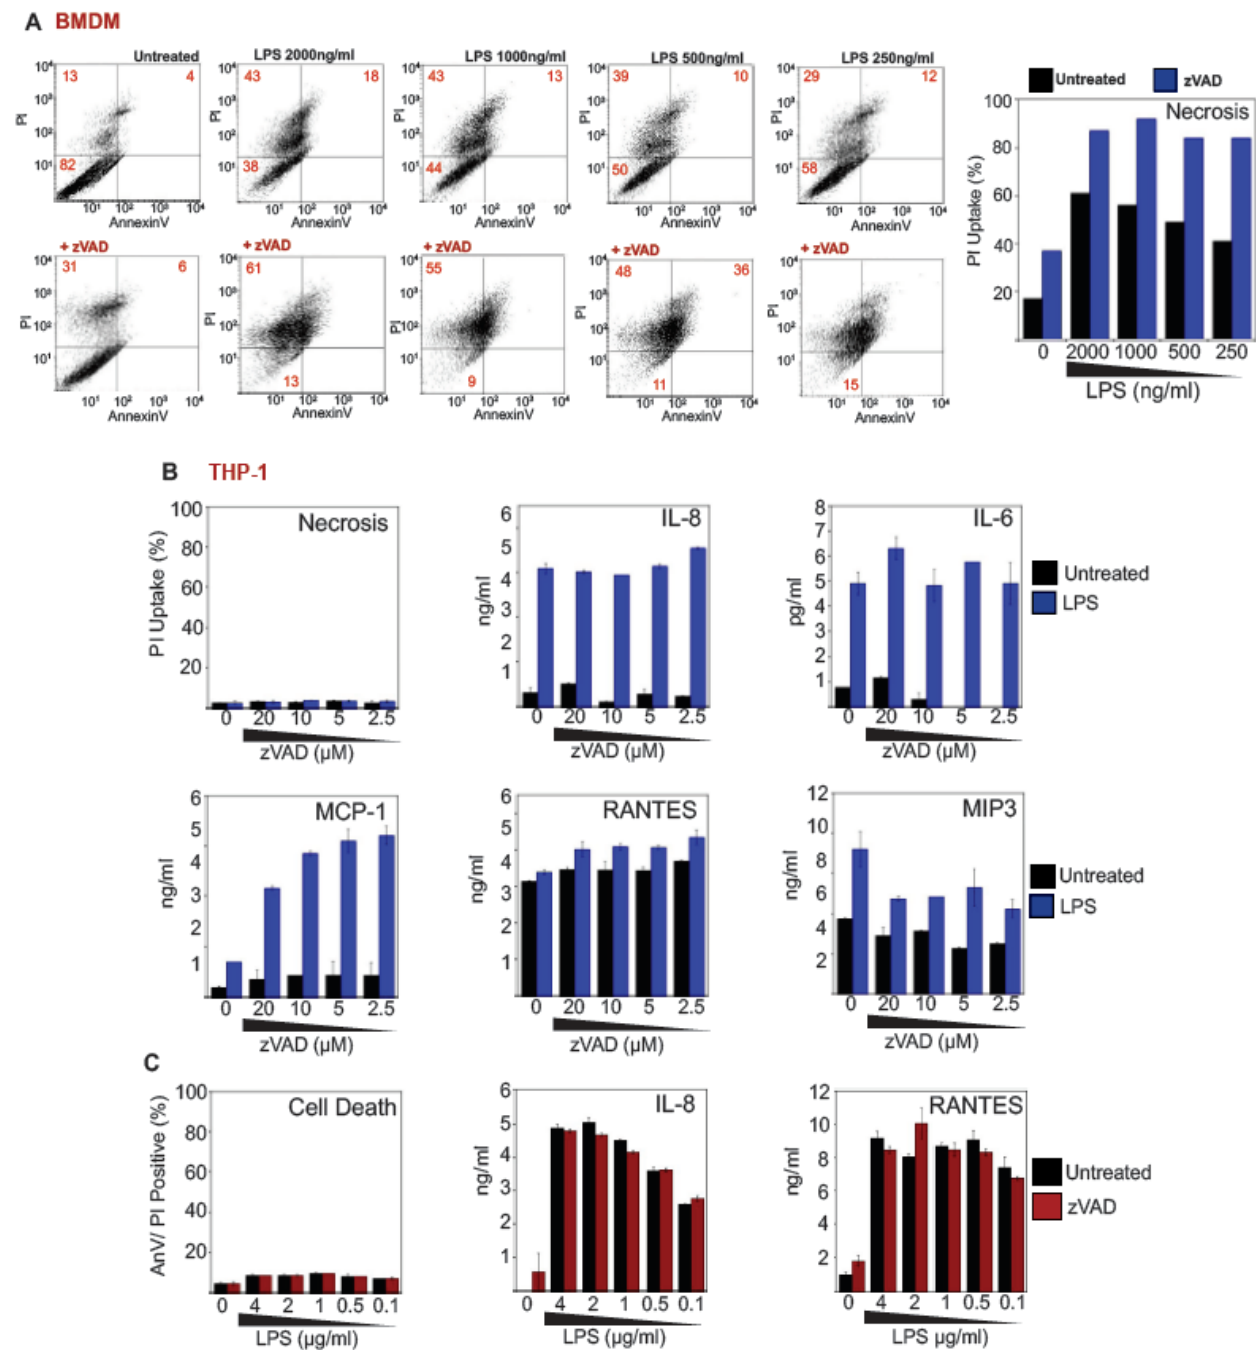

**Figure S5. LPS induced necroptosis in the presence of zVAD.**

(A) BMDMs were pretreated with zVAD (15  $\mu$ M) for 1 h, followed by addition of LPS to the indicated concentrations. After 48 h, cell death was analysed by AnnexinV/Propidium iodide staining.

(B) THP-1 cells were pretreated with the indicated concentrations of zVAD for 1 h, followed by addition of LPS to 5 ug/ml. After 6 h, cell death was analysed by PI uptake and cytokine/chemokine concentrations in the culture supernatants were determined by ELISA.

(C) THP-1 cells were pretreated with zVAD (10  $\mu$ M) for 1 h, followed by addition of LPS to the indicated concentrations. After 24 h, cell death was analysed by PI uptake and cytokine/chemokine concentrations in the culture supernatants were determined by ELISA. Error bars represent the mean  $\pm$ SEM of triplicate determinations from a representative experiment

## SUPPLEMENTAL EXPERIMENTAL PROCEDURES

**Cell culture.** HT-29 cells were cultured in DMDM media (Gibco), supplemented with 10% fetal calf serum (FCS). THP-1 cells were cultured in RPMI media (Gibco) supplemented with 10 % FCS. Cells were cultured at 37°C in humidified atmosphere with 5% CO<sub>2</sub>.

### Real-Time PCR primers

| Gene   | Forward Primer 5'-3'     | Reverse Primer 5'-3'            |
|--------|--------------------------|---------------------------------|
| MCP-1  | CAGCCAGATGCAATCAATGCC    | 5'-TGGAATCCTGAACCCACTTCT        |
| IL-6   | GAATCCTTCTCCACAAGCGCCTT  | 5'-CAAAAGACCAGTGATGATTTTCACCAGG |
| CXCL1  | AACCGAAGTCATAGCCACAC     | 5'-GTTGGATTTGTCACTGTTTCAGC      |
| RANTES | TACACCAGTGGCAAGTGCTC     | 5'-GAAGCCTCCCAAGCTAGGAC         |
| GMCSF  | GAGCATGTGAATGCCATCCAGGAG | 5'-AGGTGGCGTAGAACGCGGTA         |
| Actin  | ATGTTTGAGACCTTCAACAC     | 5'-CACGTCACACTTCATGATGG         |
